# Supplementary material
Source: publisher figshare collection journal article supplement (https://acs.figshare.com/ndownloader/files/5214901)

## Supporting Information for

### Selective Homo- and Heterodehydrocouplings of Phosphines Catalyzed by Rhodium Phosphido Complexes

Li-Biao Han and T. Don Tilley

Department of Chemistry, University of California, Berkeley, Berkeley, California 94720-1460

#### Data for new compounds:

##### Complex **3a** (See Copies of NMR Charts 1 and 2)

The NMR spectroscopies of **3a** at room temperature in benzene are complicated and not easily assignable (NMR Charts 1 and 2). The proposed structure is consistent with the elemental analysis, and the NMR data is consistent with that of crystallographically characterized **3b**, which was unambiguously shown to be a dimer.

Brown solid, mp 238 °C (dec). Calcd for  $C_{40}H_{76}P_6Rh_2$ : C, 50.64; H, 8.07. Found: C, 50.99; H, 8.26.

$^1H$  NMR ( $C_6D_6$ , 400 MHz)  $\delta$  8.03-8.19 (m, 4 H), 7.06-7.18 (m, 6 H), 3.15-4.95 (m, 2 H, P-H), 2.21-2.32 (m, 2 H,  $CH_2P$ ), 2.02-2.18 (m, 2 H,  $CH_2P$ ), 1.85-1.97 (m, 4 H,  $CH_2P$ ), 0.38-1.49 (m, 28 H, i-Pr).  $^{31}P$  NMR ( $C_6D_6$ , 162 MHz)  $\delta$  82.3-86.0 (multiple sets of doublets, dppe), -120.6 - -118.3 (m, PH), -126.5 - -124.0 (m, PH).

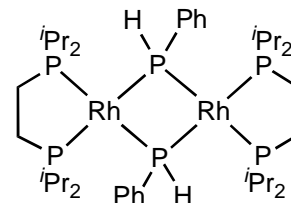

##### Complex **3b** (See Copies of NMR Charts 3 and 4)

Orange solid; mp 245 °C (dec). Calcd for  $C_{46}H_{88}P_6Rh_2$ : C, 53.49; H, 8.59. Found: C, 53.71; H, 8.79.

$^1H$  NMR ( $C_6D_6$ , 400 MHz)  $\delta$  6.99 (s, 2 H,  $C_6H_2Me_3$ ), 6.84 (s, 2 H,  $C_6H_2Me_3$ ), 4.63 (s, 6 H,  $C_6H_2Me_3$ ), 3.24-3.91 (m, 2 H, PH), 2.83 (s, 6 H,  $C_6H_2Me_3$ ), 2.31 (s, 6 H,  $C_6H_2Me_3$ ), 1.71-1.88 (m, 8 H,  $CH_2$ ), 1.63 (dd, 12 H,  $J = 7.2$ , 13.2 Hz,  $CHMe_2$ ), 1.17 (dd, 12 H,  $J = 6.8$ , 14.0 Hz,  $CHMe_2$ ), 0.79-0.91 (m, 0.82 (t-like, 12 H,  $J = 7.6$  Hz,  $CHMe_2$ ), 0.71-0.82 (m, 4 H,  $CHMe_2$ ), 0.46 (dd, 12 H,  $J = 7.2$ , 15.6 Hz,  $CHMe_2$ ).  $^{31}P$  NMR ( $C_6D_6$ , 162 MHz)  $\delta$  81.3-83.6 (multiple sets of doublets, dppe), -253.8 - -251.0 (m, PH).

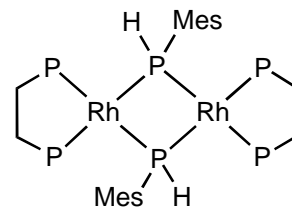

##### Complex **3c-PhMe** (See Copies of NMR Charts 5 and 6)

Red solid; mp 198 °C (dec). Calcd for  $C_{59}H_{92}P_6Rh_2$ : C, 59.40; H, 7.77. Found: C, 59.29; H, 7.50.

$^1H$  NMR ( $C_6D_6$ , 400 MHz)  $\delta$  8.38-8.47 (m, 8 H, Ph), 6.95-7.18 (m, 12 H, Ph), 1.62 (bs, 8 H,  $CH_2$ ), 0.87-1.11 (m, 56 H, i-Pr).  $^{31}P$  NMR ( $C_6D_6$ , 162 MHz)  $\delta$  71.4-75.6 (multiple sets of doublets, dppe), -112.4 - -108.1 (m,  $\mu-PPh_2$ ).

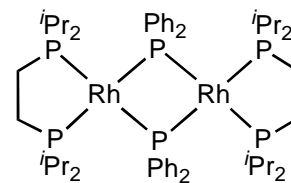

##### Complex **4** (See Copies of NMR Charts 7 and 8)

Red solid; mp 151 °C (dec). Calcd for  $C_{38}H_{53}P_4Rh$ : C, 61.96; H, 7.25. Found: C, 62.02; H, 7.32.

$^1H$  NMR ( $C_6D_6$ , 400 MHz)  $\delta$  7.99 (bs, 4 H, Ph), 7.43 (bs, 4 H), 6.89-7.02 (m, 12 H), 6.00 (bs, 1 H, P-H), 2.77 (bs, 4 H,  $CH_2$ ), 0.84-1.35 (m, 28 H, i-Pr).  $^{31}P$  NMR ( $C_6D_6$ , 162 MHz)  $\delta$  79.8-81.5 (multiple sets of doublets, dppe), 74.3-77.5 (multiple sets of

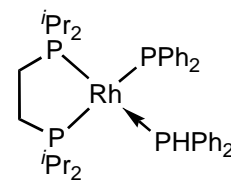

doublets, dppe), 13.7-16.7 (multiple sets of doublets,  $\text{PPh}_2$ ), -47.2 - -46.3 (m,  $\text{PPh}_2$ ).

**Complex 6 (See Copies of NMR Charts 9 and 10)**

Orange solid; mp 155 °C (dec). Calcd for  $\text{C}_{40}\text{H}_{74}\text{P}_4\text{Rh}_2\text{S}_2$ : C, 50.63; H, 7.86. Found: C, 50.94; H, 7.81.

$^1\text{H}$  NMR ( $\text{C}_6\text{D}_6$ , 400 MHz)  $\delta$  8.29-8.30 (m, 4 H, Ph), 6.92-7.11 (m, 6 H, Ph), 1.72-1.90 (m, 4 H,  $\text{CH}_2$ ), 1.32-1.33 (m, 12 H, i-Pr), 0.94-1.03 (m, 16 H, i-Pr).  $^{31}\text{P}$  NMR ( $\text{C}_6\text{D}_6$ , 162 MHz)  $\delta$  88.3 (d,  $J_{\text{PRh}} = 173.0$  Hz).

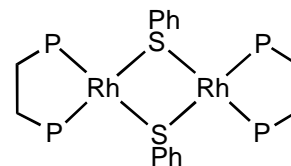

**Complex 7b (See Copies of NMR Charts 11 and 12)**

Yellow solid; mp 128 °C (dec). Calcd for  $\text{C}_{32}\text{H}_{48}\text{P}_3\text{RhS}$ : C, 58.18; H, 7.32; S, 4.85. Found: C, 58.30; H, 7.45; S, 4.68.

$^1\text{H}$  NMR ( $\text{C}_6\text{D}_6$ , 400 MHz)  $\delta$  7.80-7.91 (m, 6 H), 6.79-7.02 (m, 9 H), 5.98 (d, 1 H,  $J = 10.8$  Hz), 2.28-2.42 (m, 2 H,  $\text{CH}_2$ ), 1.61-1.80 (m, 2 H,  $\text{CH}_2$ ), 0.84-1.37 (m, 28 H, i-Pr).  $^{31}\text{P}$  NMR ( $\text{C}_6\text{D}_6$ , 162 MHz)  $\delta$  89.7 (ddd,  $-\text{CH}_2\text{P}^i\text{Pr}_2$  *cis* to  $\text{PPh}_2\text{H}$ ,  $J_{\text{PP}} = 24.7$ , 35.9 Hz,  $J_{\text{PRh}} = 152.7$  Hz), 81.2 (ddd,  $-\text{CH}_2\text{P}^i\text{Pr}_2$  *trans* to  $\text{PPh}_2\text{H}$ ,  $J_{\text{PP}} = 24.7$ , 351.5 Hz,  $J_{\text{PRh}} = 145.6$  Hz), 1.2 (ddd,  $\text{PPh}_2\text{H}$ ,  $J_{\text{PP}} = 35.9$ , 356.5 Hz,  $J_{\text{PRh}} = 131.5$  Hz).

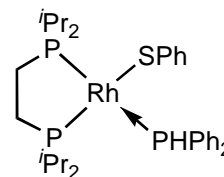

**Rhodium-catalyzed Dehydrocoupling of phosphines**

(1) Dehydrocoupling of  $\text{PPh}_2\text{H}$  was carried out under various reaction conditions as summarized below. For concentrations in the range of 0.18 M to 1.00 M, reactions proceed similarly. On the other hand, the addition of dippe gave a better yield of the coupling products. Though heating the mixture at 70 °C gave a better conversion of  $\text{PPh}_2\text{H}$ , other products were also formed as confirmed by  $^{31}\text{P}$  NMR and the selectivity to  $(\text{PPhH})_2$  was only 36%. The reaction proceeds faster in THF to give a complicated mixture of dehydrocoupling products in which  $(\text{PPhH})_2$  was formed with a selectivity of 30%. Catalysts generated *in situ*, by addition of dippe or dchpe to **1**, behaved similarly to those based on the isolated phosphine complexes. As shown below, other catalysts obtained by addition of a phosphine to **1** did not show catalytic activity (20 °C, overnight). A typical  $^{31}\text{P}$  NMR spectrum of a dehydrocoupling reaction mixture (5 mol% cat. **1**, 1.0 M, 20 h) is attached (**NMR Chart 13**). The product  $(\text{PPhH})_2$  was identified by comparing its spectra with those reported in the literature (Xin, S.; Woo, H. G.; Harrod, J. F.; Samuel, E.; Lebus, A.-M. *J. Am. Chem. Soc.* **1997**, 119, 5307).

(2) Dehydrocoupling products from other phosphines.

**(2-EtC<sub>6</sub>H<sub>4</sub>PH)<sub>2</sub>**: a mixture of *meso,rac* isomers; ratio ( $^{31}\text{P}$  NMR chemical shift): 53 (-76.0 ppm), 47 (-83.5 ppm); HRMS calcd for  $\text{C}_{16}\text{H}_{20}\text{P}_2$ ,  $m/z$  274.1040. Found: 274.1045.

**(2-i-PrC<sub>6</sub>H<sub>4</sub>PH)<sub>2</sub>**: a mixture of *meso,rac* isomers; ratio ( $^{31}\text{P}$  NMR chemical shift): 57 (-72.6 ppm), 43 (-80.4 ppm); HRMS calcd for  $\text{C}_{18}\text{H}_{24}\text{P}_2$ ,  $m/z$  302.1353. Found: 302.1359.

**(MesPH)<sub>2</sub>**: a mixture of *meso,rac* isomers; ratio ( $^{31}\text{P}$  NMR chemical shift): 62 (-111.9 ppm), 38 (-119.2 ppm); HRMS calcd for  $\text{C}_{18}\text{H}_{24}\text{P}_2$ ,  $m/z$  302.1353. Found: 302.1348.

**(MesPH)<sub>2</sub>**: a mixture of *meso,rac* isomers; ratio ( $^{31}\text{P}$  NMR chemical shift): 59 (-113.3 ppm), 41 (-118.0 ppm); HRMS calcd for  $\text{C}_{30}\text{H}_{48}\text{P}_2$ ,  $m/z$  470.3231. Found: 470.3238.

**(Ph<sub>2</sub>P)<sub>2</sub>**: This is a known compound, Bohm, V. P. W.; Brookhart, M. *Angew. Chem. Int. Ed.* **2001**, 40, 4694.

**Ph<sub>2</sub>PSPH**:  $^{31}\text{P}$  NMR chemical shift: -41.7; HRMS calcd for  $\text{C}_{18}\text{H}_{15}\text{PS}$ ,  $m/z$  294.0632. Found: 294.0627. This is a known compound: (a) Peake, S.C.; Schmutzler, R. *J. Chem. Soc. A*, **1970**, 1049-1054. (b) Hall, C. D.; Tweedy, B. R.; Kayhanian, R.; Lloyd, J. R. *J. Chem. Soc. Perkin Trans.2* **1992**, 775.

## Optimization of the reaction condition

|                                                                                                                                   |                                                                                |                                                                          |
|-----------------------------------------------------------------------------------------------------------------------------------|--------------------------------------------------------------------------------|--------------------------------------------------------------------------|
| $\text{Ph-PH}_2 \xrightarrow[\text{C}_6\text{D}_6, \text{rt, x h}]{\text{ca. 5 mol\% } \mathbf{1}} \text{Ph-P-P-Ph} + \text{H}_2$ |                                                                                |                                                                          |
| concentration                                                                                                                     | [0.18 M]                                                                       | 20 h, 30 %                                                               |
|                                                                                                                                   | [0.68 M]                                                                       | 3h, 20% ; 20 h, 34%                                                      |
|                                                                                                                                   | [1.00 M]                                                                       | 3h, 20% ; 20 h, 36%                                                      |
|                                                                                                                                   | [70°C (1 h), 60% conv. of PhPH <sub>2</sub> (36% sel. to (PPhH) <sub>2</sub> ] |                                                                          |
| additive                                                                                                                          | [1.00 M] /1.0 equiv. <b>dippe</b>                                              | 20 h, 51%                                                                |
| solvent                                                                                                                           | [1.00 M] /1.0 equiv. dippe<br><b>THF</b>                                       | 20 h, 80 % conv. of PhPH <sub>2</sub> (30% sel. to (PPhH) <sub>2</sub> ) |
|                                                                                                                                   | [1.00 M] /1.0 equiv. dippe<br><b>hexane</b>                                    | 20 h, 36 %                                                               |
|                                                                                                                                   | [1.00 M] /1.0 equiv. dippe<br><b>CH<sub>2</sub>Cl<sub>2</sub></b>              | 20 h, 20%                                                                |
|                                                                                                                                   |                                                                                |                                                                          |
| in situ generated cat.                                                                                                            | Rh(cod)Bn/1.0 equiv.<br>dippe/[1.00 M]                                         | 20 h, 31%                                                                |
|                                                                                                                                   | Rh(cod)Bn/2.0 equiv.<br>dippe/[1.00 M]                                         | 20 h, 52%                                                                |
|                                                                                                                                   | Rh(cod)Bn/1.0 equiv.<br>dchpe/[1.00 M]                                         | 20 h, 32%                                                                |

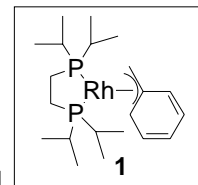

No coupling with Rh(cod)Bz, Rh(cod)Bz/ 2 or 4 equiv. PEt<sub>3</sub>, Rh(cod)Bz/ 2 or 4 equiv. P(t-Bu)<sub>3</sub>, Rh(cod)Bz/ 2 equiv. dmpe, Rh(cod)Bz/ 2 equiv. dppe, [Rh(cod)Cl]<sub>2</sub>, [Rh(cod)Cl]<sub>2</sub>/2equiv. dippe

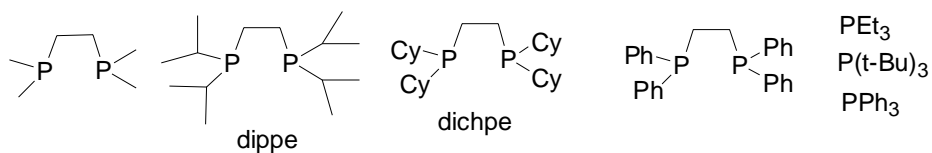

| Number of Days | Frequency (Number of Subjects) |
|----------------|--------------------------------|
| 1              | 46.649                         |
| 2              | 39.918                         |
| 3              | 3.187                          |
| 4              | 2.328                          |
| 5              | 2.311                          |
| 6              | 2.148                          |
| 7              | 2.123                          |
| 8              | 1.968                          |
| 9              | 1.952                          |
| 10             | 1.937                          |
| 11             | 1.920                          |
| 12             | 1.902                          |
| 13             | 1.865                          |
| 14             | 1.848                          |
| 15             | 1.488                          |
| 16             | 1.471                          |
| 17             | 1.452                          |
| 18             | 1.435                          |
| 19             | 1.296                          |
| 20             | 1.278                          |
| 21             | 1.260                          |
| 22             | 1.242                          |
| 23             | 1.228                          |
| 24             | 1.220                          |
| 25             | 1.211                          |
| 26             | 1.188                          |
| 27             | 1.127                          |
| 28             | 1.109                          |
| 29             | 1.094                          |
| 30             | 1.077                          |
| 31             | 1.036                          |
| 32             | 1.018                          |
| 33             | 1.004                          |
| 34             | 0.987                          |
| 35             | 0.949                          |
| 36             | 0.931                          |
| 37             | 0.924                          |
| 38             | 0.907                          |
| 39             | 0.878                          |
| 40             | 0.878                          |
| 41             | -0.748                         |

## CHART 1

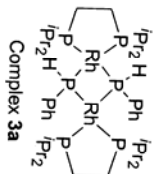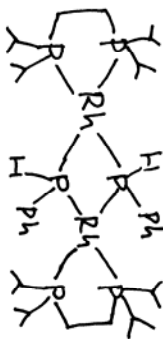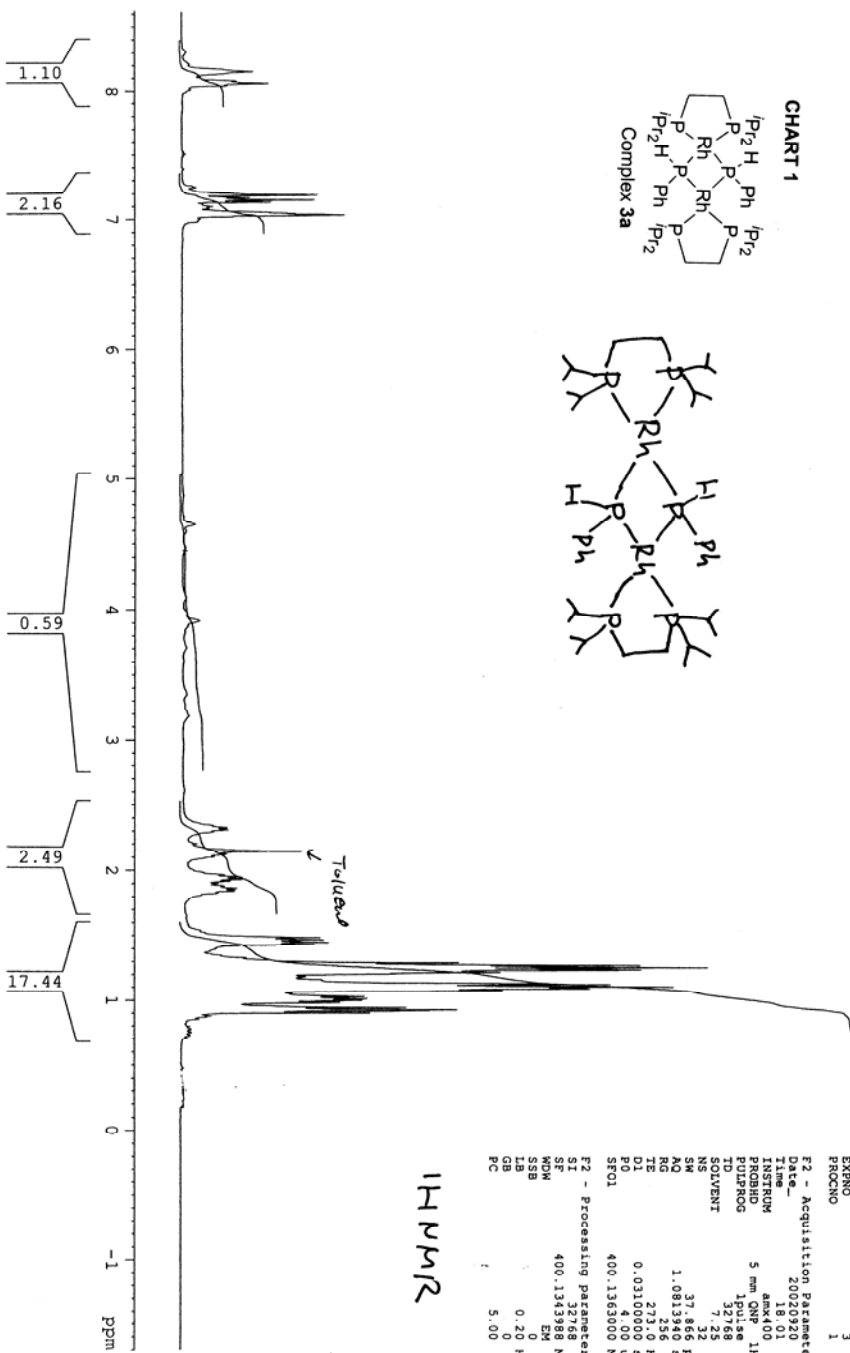

MX-400 31P(1H)

86.04  
85.35  
85.19  
85.01  
84.46  
84.31  
84.04  
83.86  
83.34  
83.16  
82.99  
82.30

Current Data Parameters  
USER han  
NAME han020920  
EXPNO 4  
PROCNO 1

-118.32  
-118.95  
-119.43  
-119.91  
-120.55  
-124.01  
-125.13  
-125.63  
-126.46

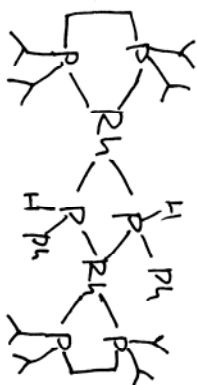

31P NMR

CHART 2

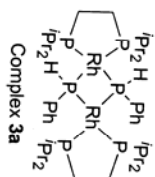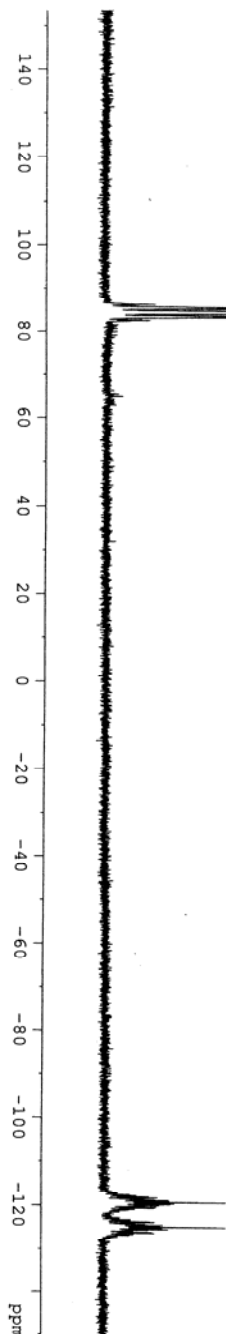

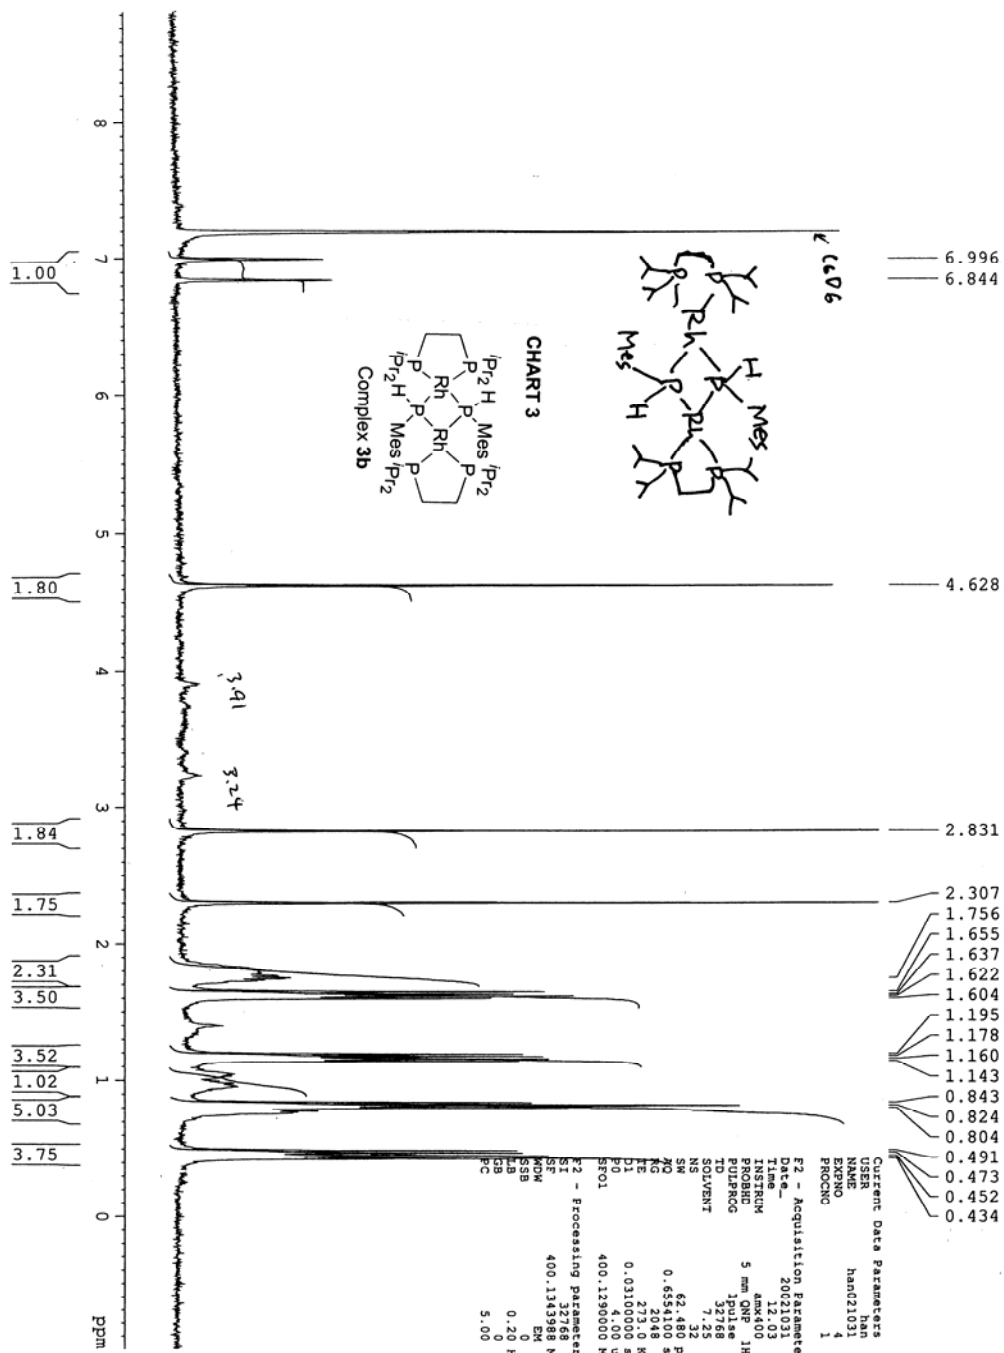

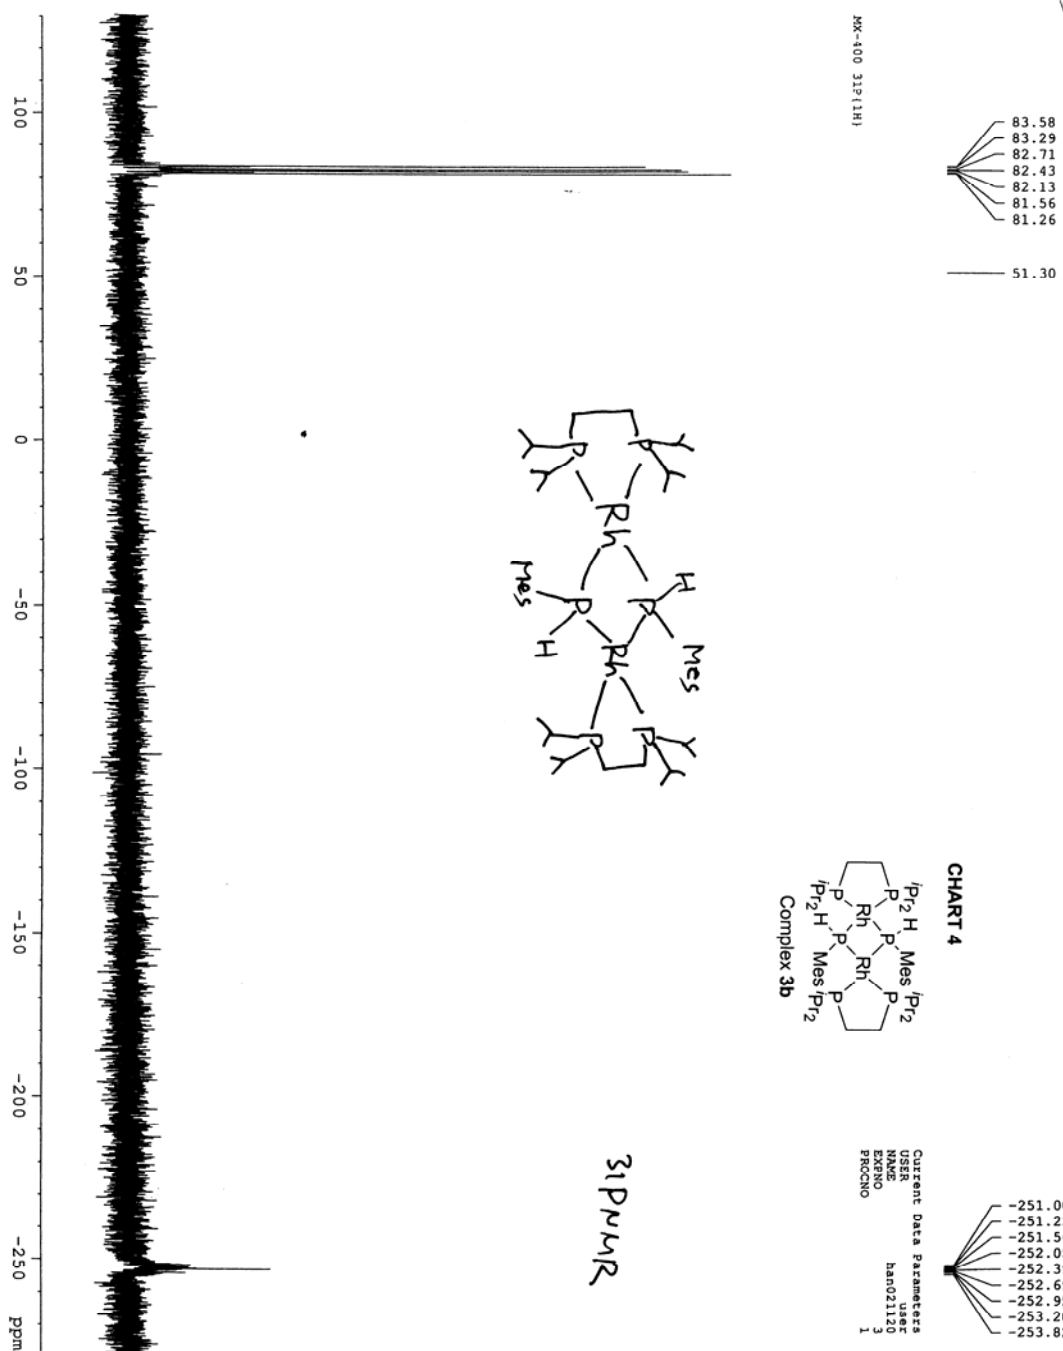

# CHART 5

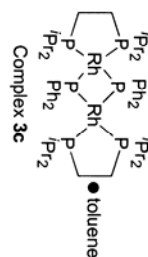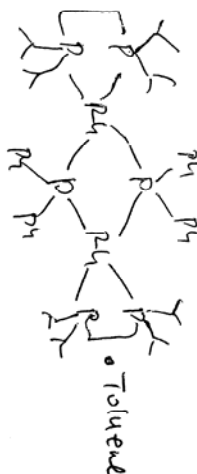

2.090  
1.629  
1.110  
1.093  
1.075  
1.058  
0.990  
0.954  
0.892  
0.874

Current Data Parameters  
USER: han  
NAME: han030211  
EXPNO: 1  
PROCNO: 1

F2 - Acquisition Parameters  
Date\_ : 20010328  
Time : 18.05  
INSTRUM : ax400  
PROBHD : 5 mm QNP 1H/1  
PULPROG : zgpg30  
TD : 65536  
SOLVENT : CDCl3  
NS : 32  
DS : 4  
AQ : 37.866 ppm  
RG : 1.081310 sec  
TE : 273.0 K  
D1 : 0.03100000 sec  
F0 : 4.00 use  
SFO1 : 100.1363000 MHz  
F2 - Processing parameters  
SI : 32768  
SF : 400.1344224 MHz  
WDW : EM  
SSB : 0  
LB : 0.20 Hz  
GB : 0  
PC : 5.00

<sup>1</sup>H NMR

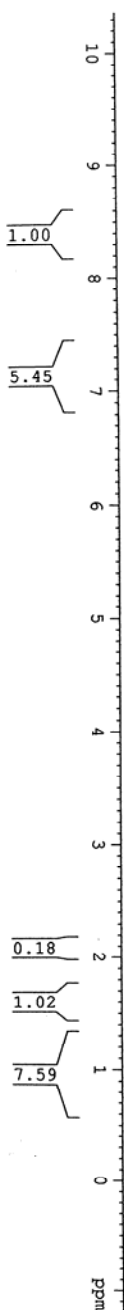



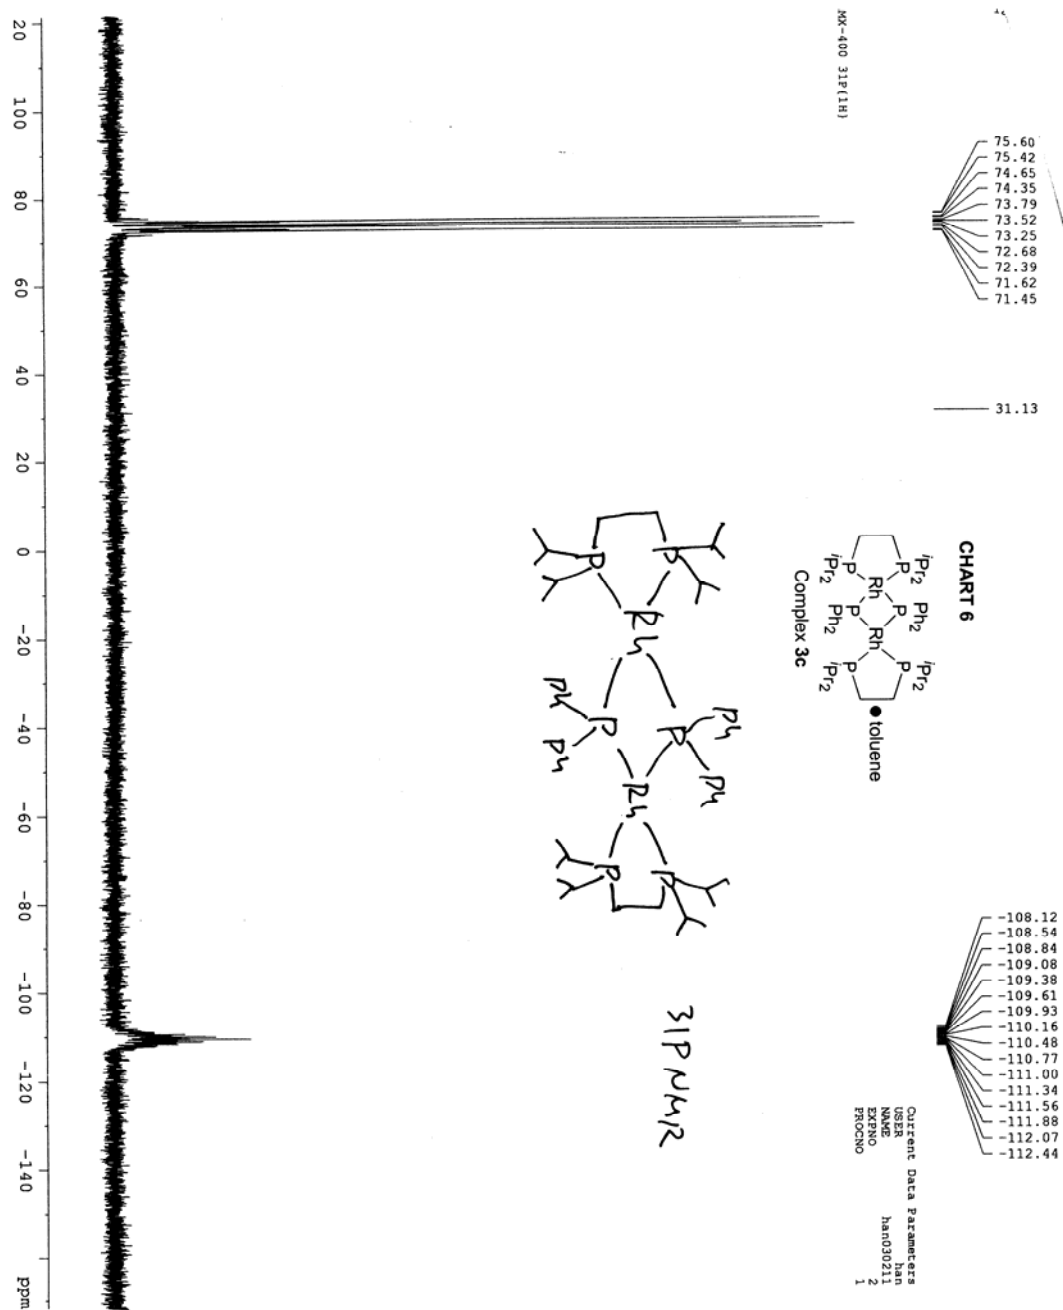

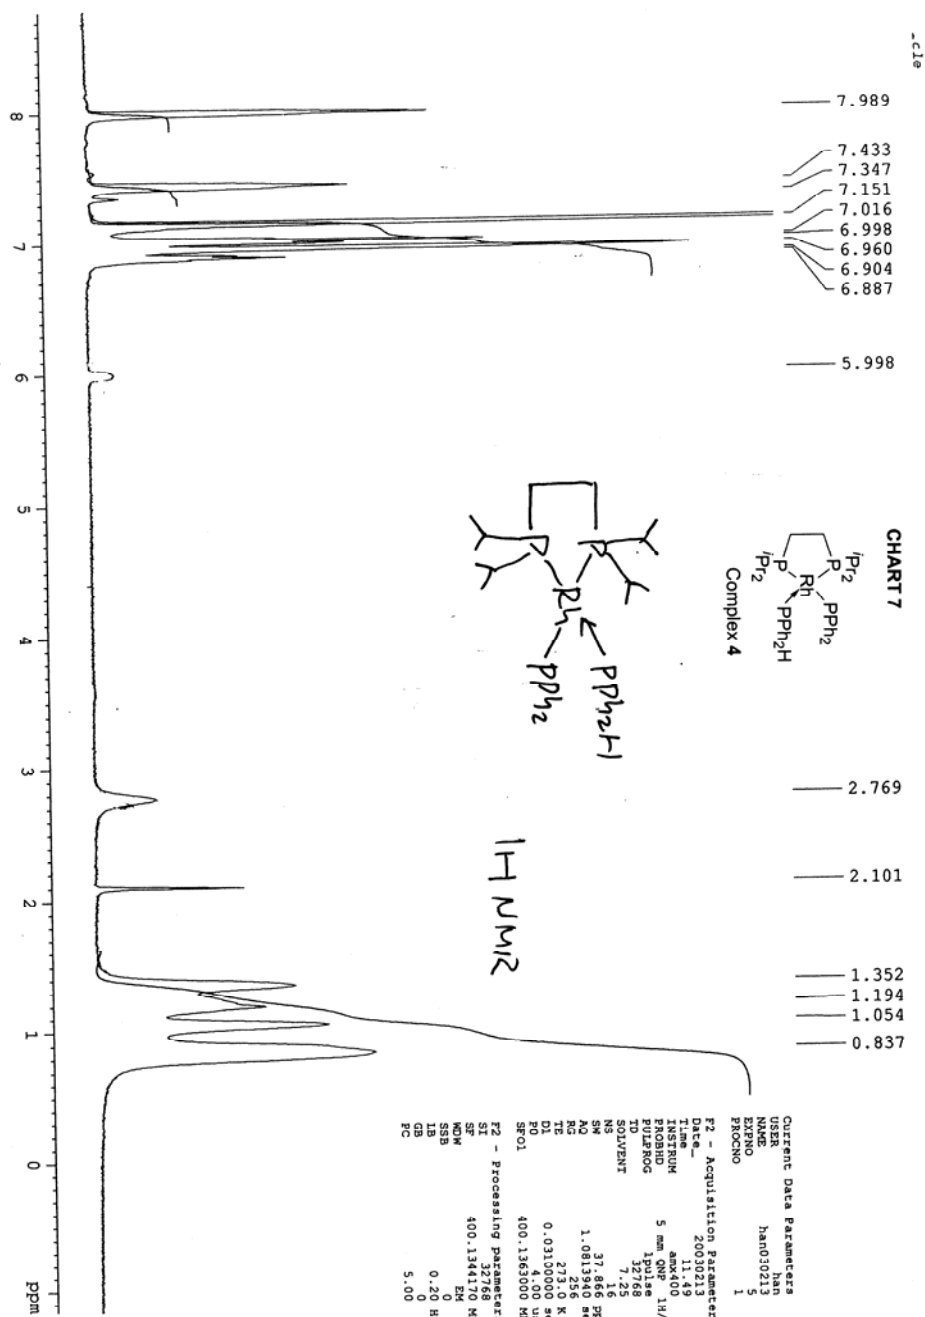



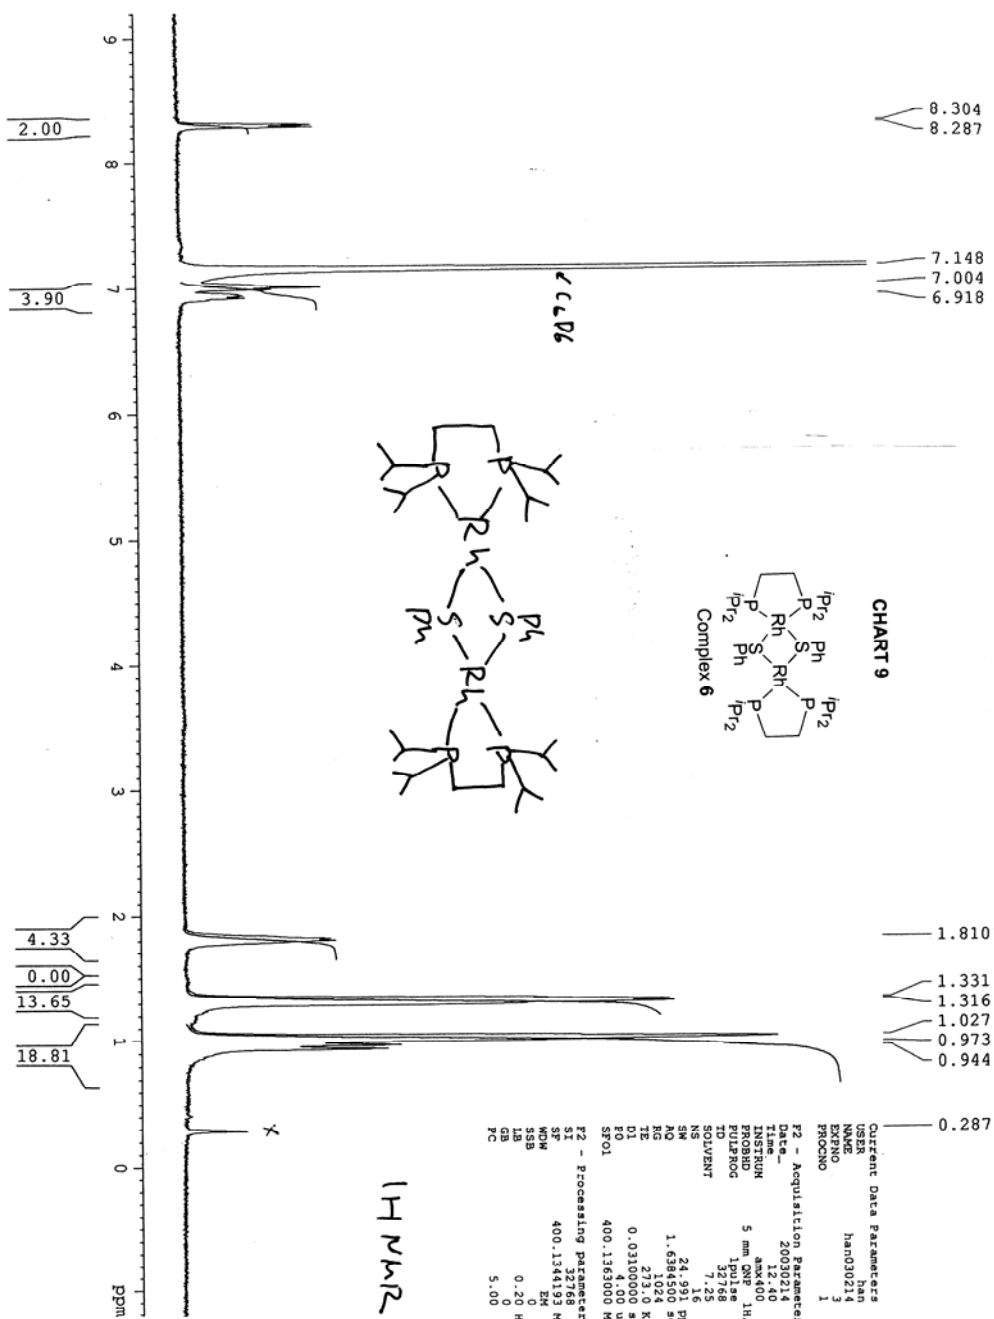

FILE

# CHART 10

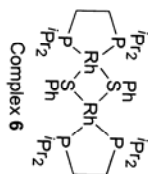

88.80  
87.73

Current Data Parameters  
USER: han  
NAME: han030214  
EXPMO: 4  
PROCNO: 1

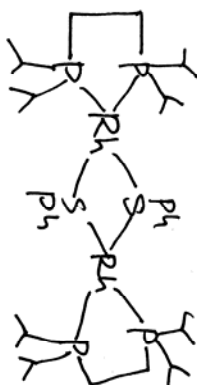

$^{13}\text{P NMR}$

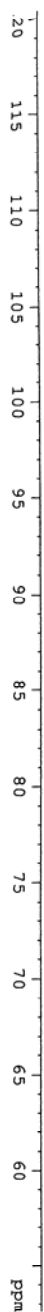

7.906  
7.886  
7.864  
7.819  
7.801  
  
7.150  
7.015  
6.997  
6.913  
6.895  
6.792  
  
5.998  
5.971

2.340  
1.721  
1.704  
1.372  
1.355  
1.334  
1.317  
1.150  
1.103  
1.054  
1.034  
0.999  
0.981  
0.968  
0.958  
0.885  
0.867  
0.855  
0.838

Complex **7b**

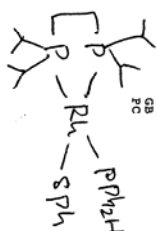

```

Current Data Parameters
USER      hns
EXPNO     1
PROCNO    1

F2 - Acquisition Parameters
Time      20030218
Time--    18.36
INSTRUM    am400
PULPROG    zgpg30
TD          65536
SOLVENT     water
RG          7.25
AQ          24.931 ppm
RG          1.684500 sec
RG          2.712
DI          0.0310000 sec
P1          4.00 usec
SF1         400.136300 MHz
SI - Processing parameters
SI         400.1344180 MHz
F1          337.68
MVM         EM
LB          0.20 Hz
GB          0
PC          3.00

```

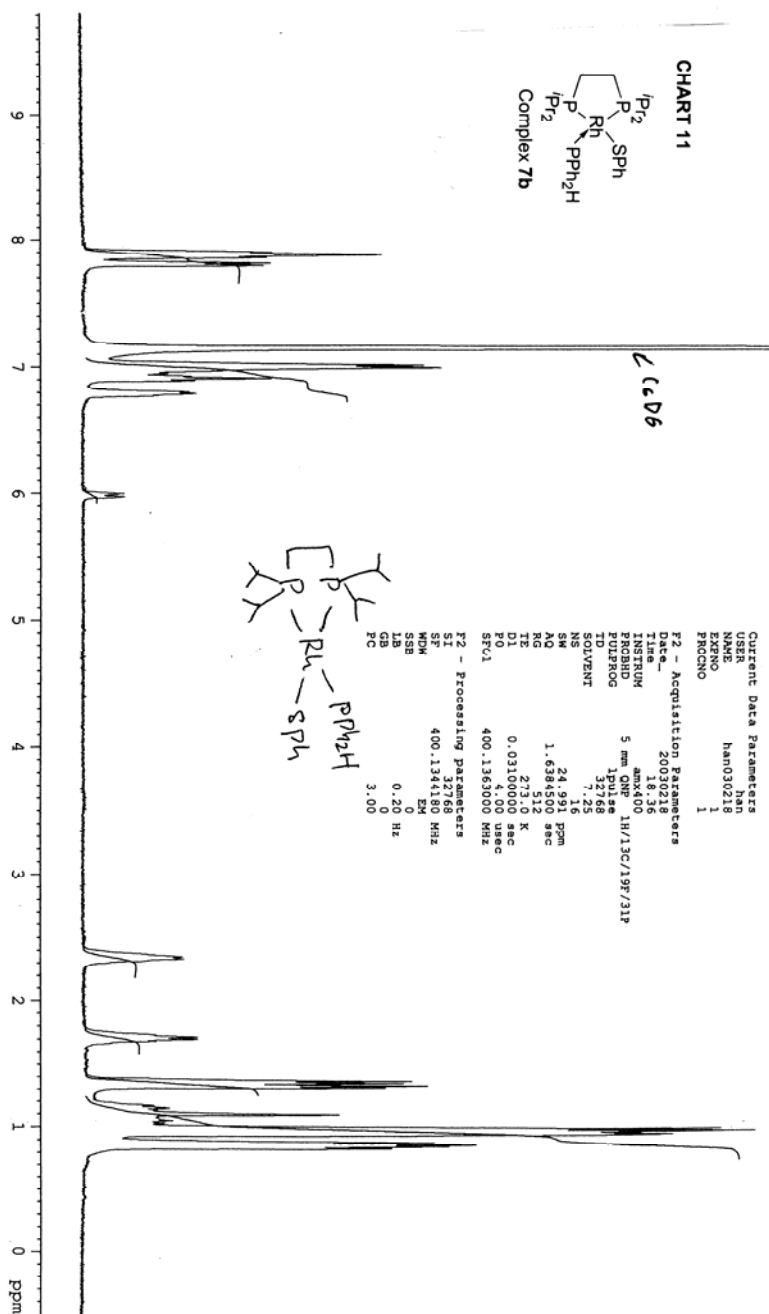



MG-400 31P (LH)

7.94

Current Data Parameters  
 USER  
 NAME han0905  
 EXPNO 2  
 PROCNO 1

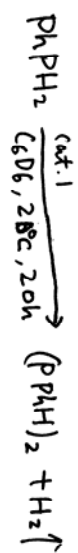

$^3\text{1P NMR}$

CHART 13

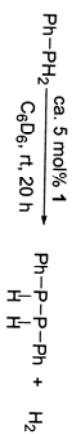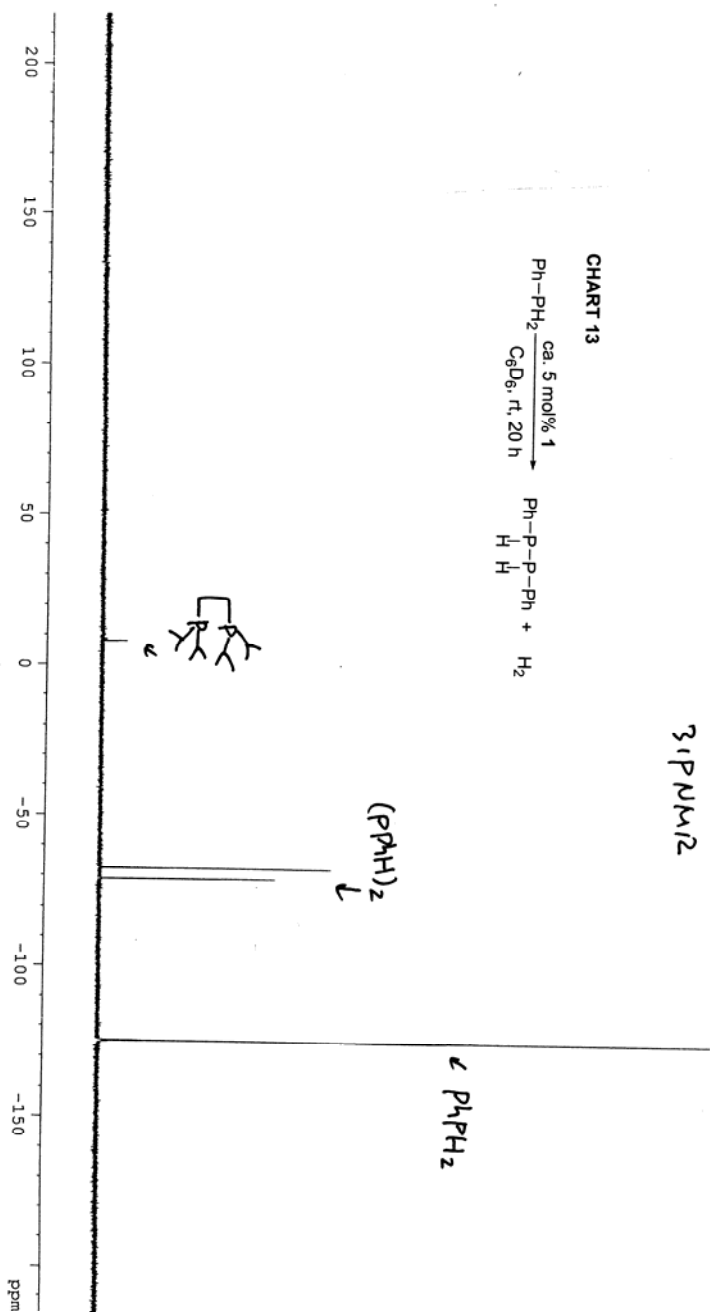

Supplement: Supplementary file 1 [file 5214901]
